# Supplementary figures and images for: Practical utilization of recombinant AAV vector reference standards: focus on vector genomes titration by free ITR qPCR
Source: PubMed Central journal article supplement — Mol Ther Methods Clin Dev. 2016 Mar 30;5:16019–. doi: 10.1038/mtm.2016.19 (PMC4813604; doi:10.1038/mtm.2016.19), 2016-03-30

# Supplementary Figure 1

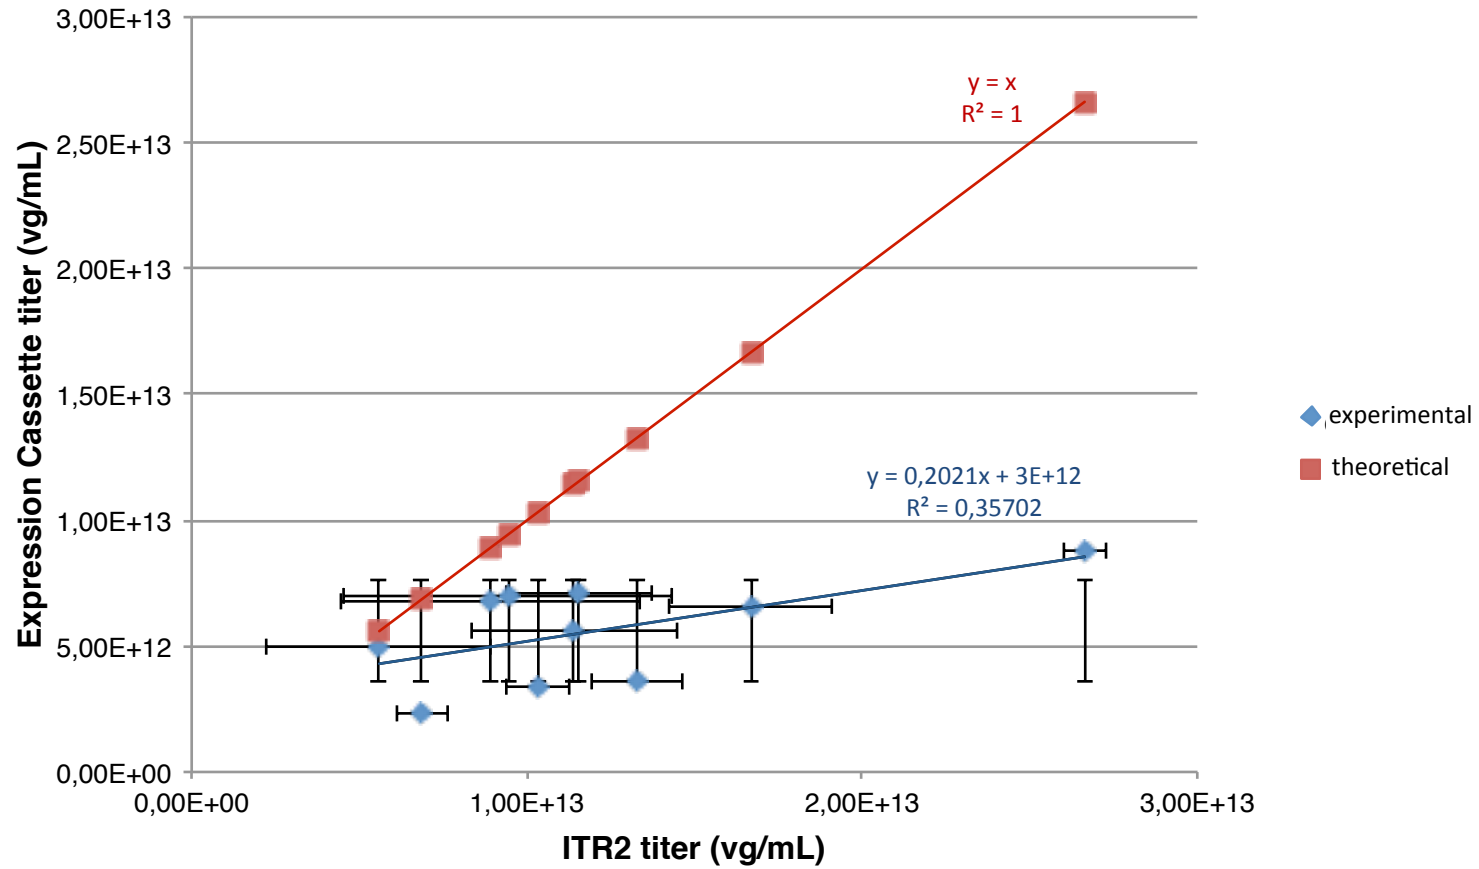

Supplement: mtm201619-s1.pdf [file mtm201619-s1.pdf]
